# Supplementary material for: Self-assembled ultrasmall mixed Co–W phosphide nanoparticles on pristine graphene with remarkable synergistic effects as highly efficient electrocatalysts for hydrogen evolution
Source: Royal Society of Chemistry journal article supplement (doi:10.1039/d2ta00555g), 2022-01-01
Supplement: d2ta00555g1.pdf [file d2ta00555g1.pdf]

## Electronic Supplementary Information

### **Self-assembled ultrasmall mixed Co-W phosphide nanoparticles on pristine graphene with remarkable synergistic effects as highly efficient electrocatalysts for hydrogen evolution**

Xiaoyan Wang,<sup>ab</sup> Jia Bo Le,<sup>c</sup> Yang Fei,<sup>d</sup> Ruiqin Gao,<sup>e</sup> Maoxiang Jing,<sup>f</sup> Weiyong Yuan<sup>\*ag</sup> and Chang Ming Li<sup>h</sup>

<sup>a</sup>Ningbo Research Institute, Zhejiang University, Ningbo 315100, China

<sup>b</sup>Research Center for Environmental and Energy Catalysis, Institute of Fundamental and Frontier Sciences, University of Electronic Science and Technology of China, Chengdu 611731, China.

<sup>c</sup>Ningbo Institute of Materials Technology and Engineering, Chinese Academy of Sciences, Ningbo 315201, China

<sup>d</sup>State Key Laboratory of Electronic Thin Film and Integrated Devices, School of Electronic Science and Engineering, University of Electronic Science and Technology of China, Chengdu 610054, China

<sup>e</sup>School of Biological and Chemical Engineering, NingboTech University, Ningbo 315100, China

<sup>f</sup>Institute for Advanced Materials, Jiangsu University, Zhenjiang 212013, China

<sup>g</sup>College of Chemical and Biological Engineering, Zhejiang University, Hangzhou 310027, China

<sup>h</sup>Institute of Materials Science and Devices, Suzhou University of Science and Technology, Suzhou 215009, China

\*Corresponding author. E-mail: [wyyuan@zju.edu.cn](mailto:wyyuan@zju.edu.cn)

#### **Contents**

1. FTIR spectra and high-resolution W 4f XPS spectra of G@HPW and G@HPW (without

- HR) and TEM images of G@HPW (without HR) and G@HPW (Fig. S1).
- EDX mapping of G@HPW after the hydrothermal reaction (Fig. S2).
  - High-resolution Co 2p<sub>3/2</sub> and P 2p XPS spectra of the sample before phosphidation (Fig. S3).
  - Size distribution of Co-W-P NPs in G@Co-W-P (Fig. S4).
  - TEM and HRTEM images of Co-W-P/G and CoP/G (Fig. S5).
  - XRD patterns of one-step hydrothermal reaction and the sample with no HPW added in the second-step hydrothermal reaction (Fig. S6).
  - TEM image and high-resolution W 4f (B) and P 2p (C) XPS spectra of WP<sub>2</sub>/G (Fig. S7).
  - Detailed comparison of the performance of G@W-Co-P in 0.5 M H<sub>2</sub>SO<sub>4</sub> with those of representative non-noble-metal HER catalysts (Table S1).
  - Enlarged LSV curve of WP<sub>2</sub>/G in 0.5 M H<sub>2</sub>SO<sub>4</sub> (Fig. S8).
  - Detailed comparison of the performance of G@W-Co-P in 1 M KOH with those of representative non-noble-metal HER catalysts (Table S2).
  - XRD pattern of G@Co-W-P after the durability tests (Fig. S9).

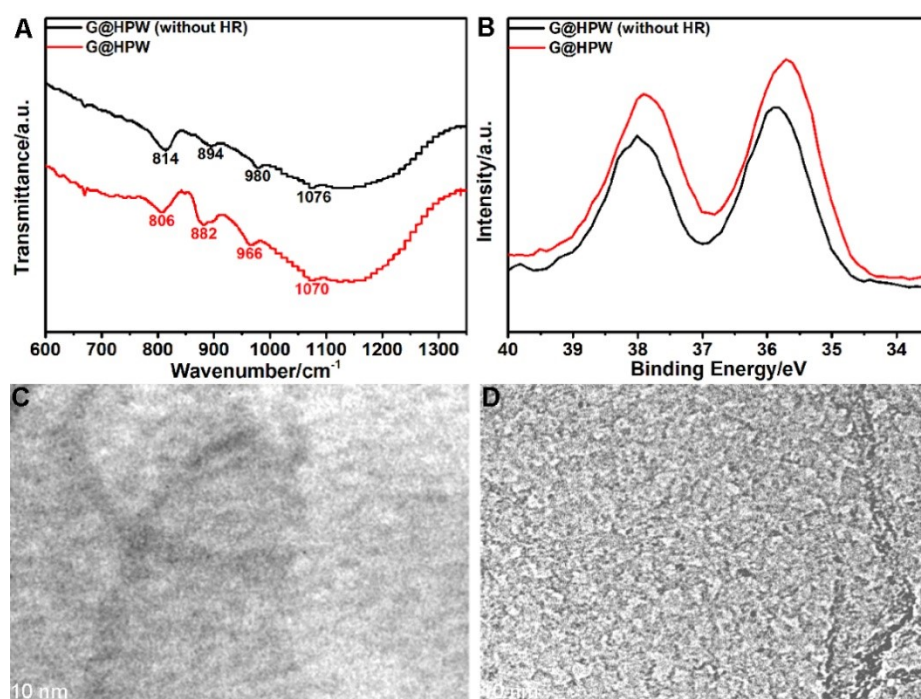

**Fig. S1** FTIR spectra (A) and high-resolution W 4f XPS spectra (B) of G@HPW and G@HPW (without HR) and TEM images of G@HPW (without HR) (C) and G@HPW (D).

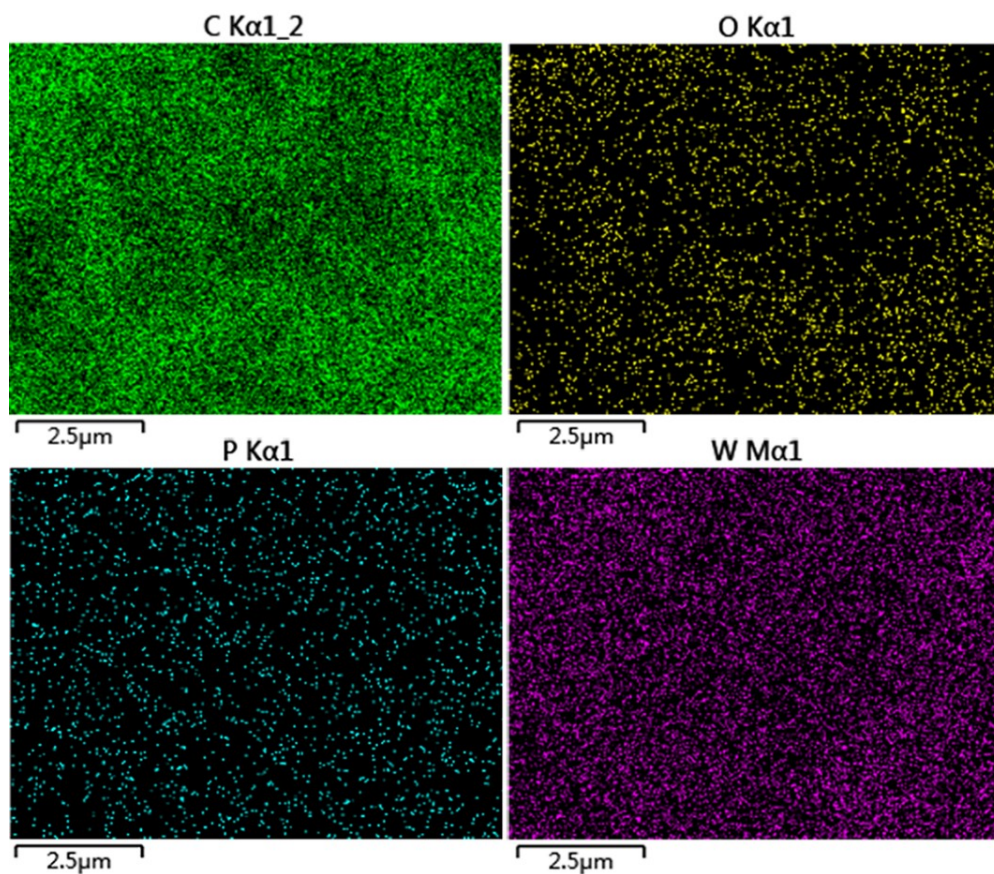

**Fig. S2** EDX mapping of G@HPW after the hydrothermal reaction.

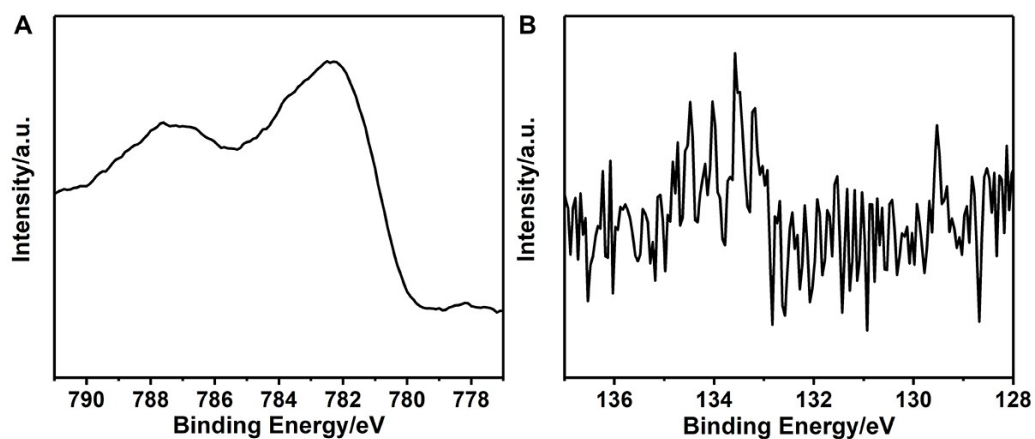

**Fig. S3** High-resolution Co 2p<sub>3/2</sub> (A) and P 2p (B) XPS spectra of the sample before phosphidation.

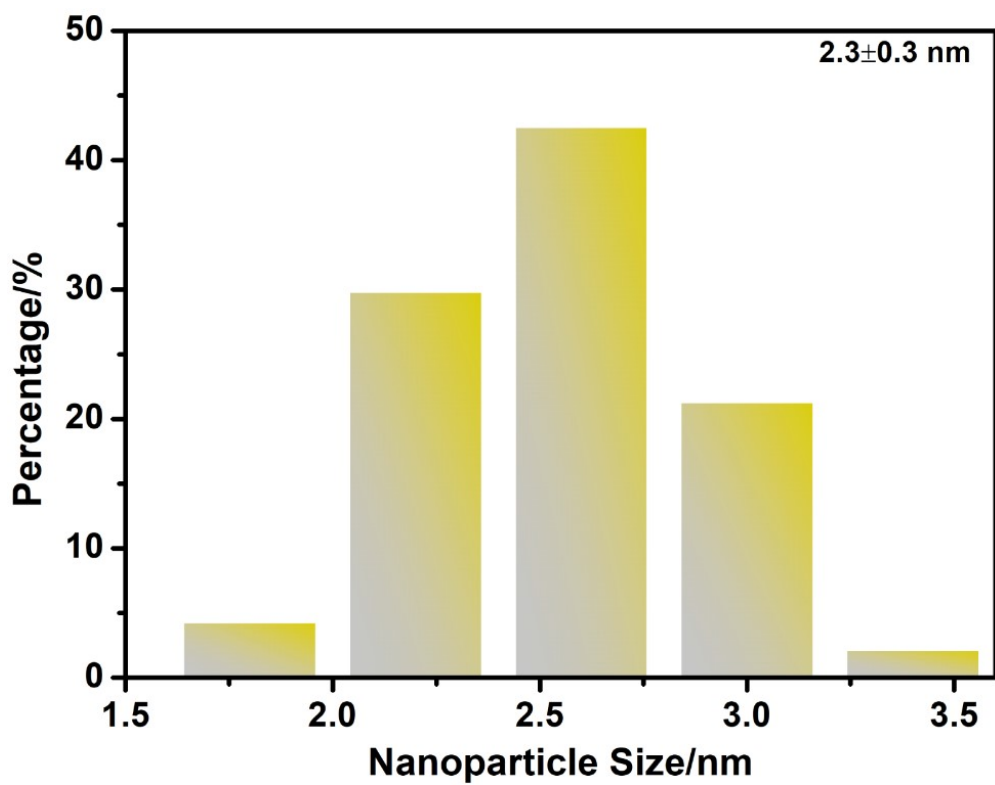

Fig. S4 Size distribution of Co-W-P NPs in G@Co-W-P.

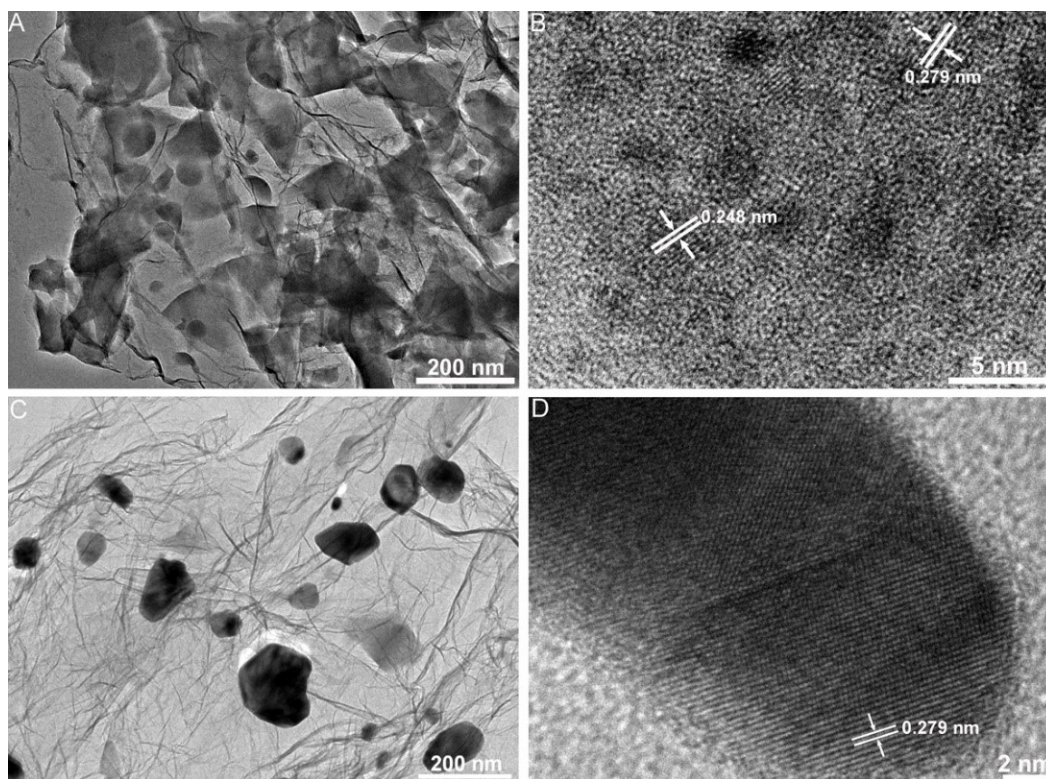

Fig. S5 TEM (A and C) and HRTEM (B and D) images of Co-W-P/G (A and B) and CoP/G (C and D).

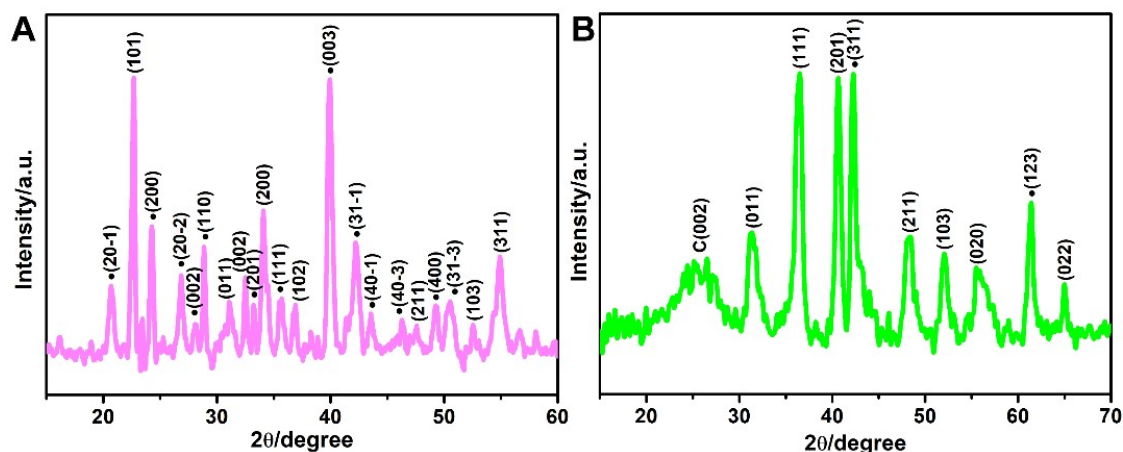

**Fig. S6** XRD patterns of one-step hydrothermal reaction (A) and the sample with no HPW added in the second-step hydrothermal reaction (B). • above the XRD pattern in (A) represents characteristic peaks of  $WP_2$  (JCPDS card no. 35-1467) and the other peaks are from CoP (JCPDS card no. 29-0497) (except the peak C (002), which is from graphene). There are some peaks from  $Co_3(PO_4)_2$  (JCPDS card no. 77-0225) in (B) (labeled with •), which is formed due to the surface oxidation under high temperature.

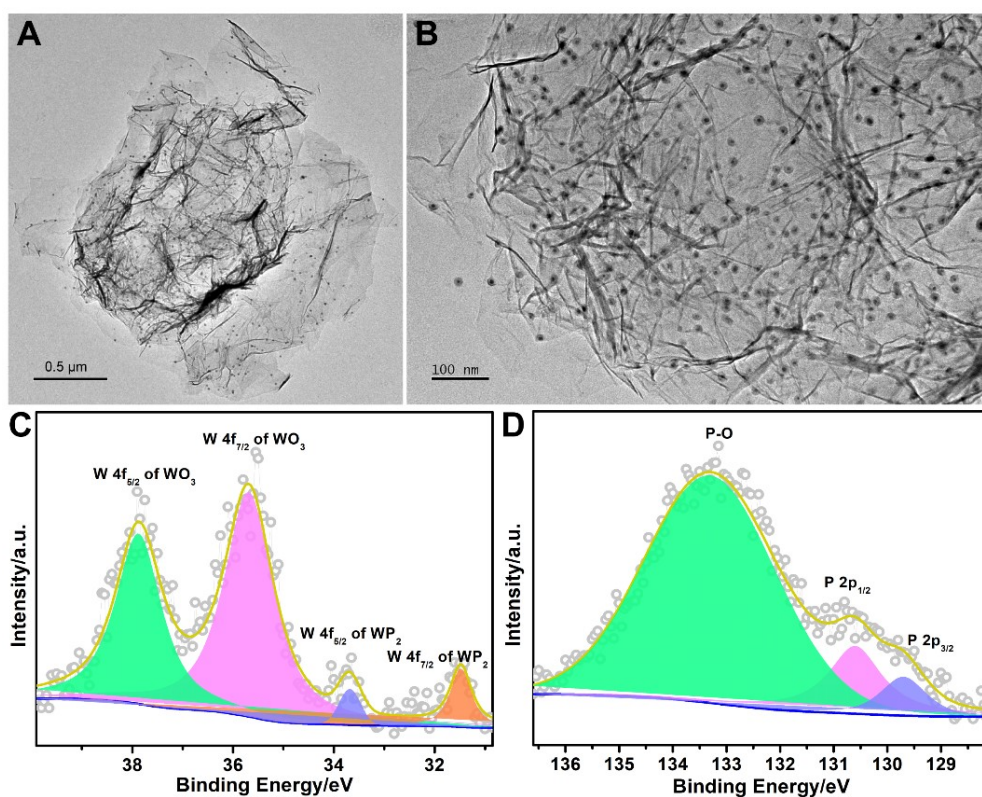

**Fig. S7** TEM image and high-resolution W 4f (B) and P 2p (C) XPS spectra of  $WP_2/G$ .

**Table S1** Detailed comparison of the performance of G@W-Co-P in 0.5 M H<sub>2</sub>SO<sub>4</sub> with those of representative non-noble-metal HER catalysts.

| Catalyst                         | Loading (mg cm <sup>-2</sup> ) | $j_0$ (mA/cm <sup>2</sup> ) | Onset overpotential (mV) | $\eta_{10}$ (mV) | Tafel slope (mV dec <sup>-1</sup> ) | Ref.      |
|----------------------------------|--------------------------------|-----------------------------|--------------------------|------------------|-------------------------------------|-----------|
| FeP <sub>2</sub> /C NPs          | 0.425                          | 0.00175                     |                          | 220              | 66                                  | S1        |
| CoP NFs                          | 0.265                          |                             |                          | 122              | 54.8                                | S2        |
| W-W <sub>2</sub> C/CNT-6         | 0.28                           |                             |                          | 155              | 56                                  | S3        |
| Fe doped NiS <sub>2</sub>        |                                |                             |                          | 198              | 42                                  | S4        |
| MoPS/NC                          | 0.56                           |                             | 23                       | 92               | 56                                  | S5        |
| CoP/CNT                          | 0.285                          | 0.13                        | 40                       | 122              | 54                                  | S6        |
| N <sub>2</sub> P-MoxC NF         | 0.265                          |                             |                          | 107              | 65.1                                | S7        |
| CoP/NCNHP                        |                                |                             |                          | 140              | 53                                  | S8        |
| CoP@NG                           | 0.283                          |                             |                          | 158              | 63.8                                | S9        |
| Mo <sub>2</sub> C-N-CNFs         | 0.255                          | 0.0473                      |                          | 167              | 70                                  | S10       |
| Ni <sub>2</sub> P/CNT            | 0.2                            | 0.0537                      |                          | 124              | 53                                  | S11       |
| WP <sub>2</sub> nanorods         | 0.285                          | 0.013                       | 101                      | 148              | 52                                  | S12       |
| FeP GS                           | 0.28                           | 0.12                        | 30                       | 123              | 50                                  | S13       |
| Ni <sub>2</sub> P@NPCNFs         | 0.56                           |                             |                          | 63.2             | 56.7                                | S14       |
| MoP@PC                           | 0.41                           |                             |                          | 153              | 66                                  | S15       |
| CoP/Co <sub>2</sub> P@NC-2       |                                |                             |                          | 126              | 79                                  | S16       |
| FeP NPs@NPC                      | 1.4                            | 0.126                       |                          | 130              | 67                                  | S17       |
| CoP-OMC                          | 0.285                          | 0.161                       | 77.74                    | 112.18           | 56.67                               | S18       |
| $\alpha$ -MoC <sub>1-x</sub> /NC |                                |                             |                          | 142              | 74                                  | S19       |
| CoP-N-C                          | 0.425                          | 0.16                        | 31                       | 91               | 42                                  | S20       |
| Ni <sub>2</sub> P hollow NPs     | 1                              | 0.033                       |                          | 117              | 46                                  | S21       |
| G@W-Co-P                         | 0.5                            | 0.128                       | 13                       | 91.5             | 40.7                                | This work |

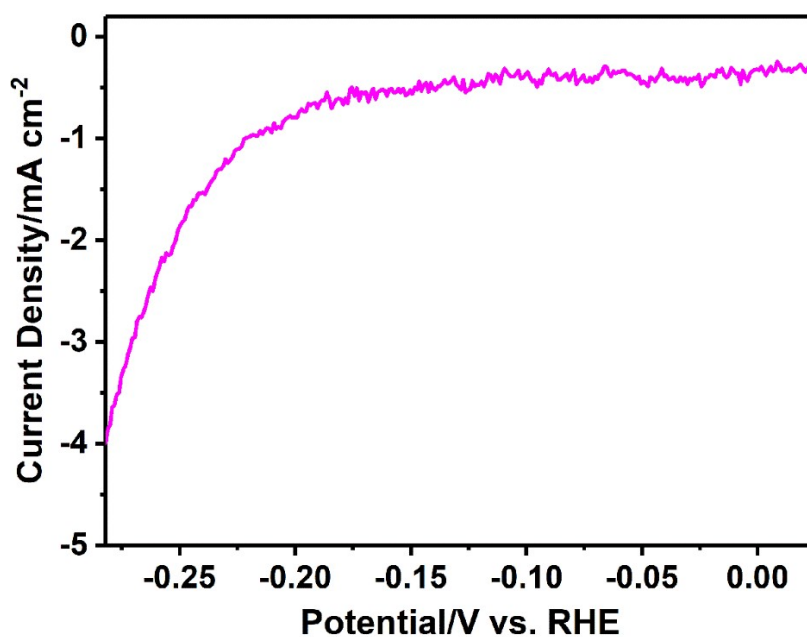

Fig. S8 Enlarged LSV curve of WP<sub>2</sub>/G in 0.5 M H<sub>2</sub>SO<sub>4</sub>.

**Table S2** Detailed comparison of the performance of G@W-Co-P in 1 M KOH with those of representative non-noble-metal HER catalysts.

| Catalyst                                         | Loading (mg cm <sup>-2</sup> ) | Onset overpotential (mV) | $\eta_{10}$ (mV) | Tafel slope (mV dec <sup>-1</sup> ) | Ref. |
|--------------------------------------------------|--------------------------------|--------------------------|------------------|-------------------------------------|------|
| CoP NFs                                          | 0.265                          |                          | 136              | 56.2                                | S1   |
| CoTeNR/NF                                        | 1.3                            |                          | 202              | 115                                 | S22  |
| Co <sub>3</sub> O <sub>4</sub> /MoS <sub>2</sub> | 2                              |                          | 205              | 98                                  | S23  |
| CoP/CC                                           | 0.92                           | 45                       | 106              | 93                                  | S24  |
| NiCoP/NPC HFSs                                   | 0.2                            | ~80                      | 128              | 70                                  | S25  |
| CoP/rGO-400                                      | 0.285                          |                          | 150              | 38                                  | S26  |
| Cu <sub>0.3</sub> Co <sub>0.27</sub> P/NC        | 0.4                            |                          | 220              | 112                                 | S27  |
| CoP/NCNHP                                        |                                |                          | 115              | 66                                  | S8   |
| CoP@NG                                           | 0.283                          |                          | 182              | 59.6                                | S9   |
| NiCoP/CNF900                                     |                                | 100                      | 130              | 83                                  | S28  |

|                                           |      |      |       |       |           |
|-------------------------------------------|------|------|-------|-------|-----------|
| Co-PNCNFs                                 | 0.56 |      | 249   | 92    | S29       |
| Ni <sub>0.69</sub> Co <sub>0.35</sub> P   | 3.5  |      | 167   | 47    | S30       |
| Ni <sub>12</sub> P <sub>5</sub> /NF       | 3    |      | 170   | 106   | S31       |
| FeP NAs/CC                                | 1.5  | 86   | 218   | 146   | S32       |
| W-W <sub>2</sub> C/CNT-6                  | 0.28 |      | 147   | 51    | S3        |
| Co <sub>4</sub> Ni <sub>1</sub> P NTs     | 0.19 |      | 129   | 52    | S33       |
| CoFe/NF                                   |      |      | 110   | 35    | S34       |
| NiCoP@NF                                  |      |      | 155   | 115   | S35       |
| WP <sub>2</sub> nanorods                  |      | 149  | 225   | 84    | S12       |
| EG/H-Co <sub>0.85</sub> Se <sub>1</sub> P | 2.1  |      | 150   | 83    | S36       |
| NiCoP/rGO                                 | 0.19 |      | 209   | 124.1 | S37       |
| G@W-Co-P                                  | 0.5  | 16.1 | 102.3 | 61.2  | This work |

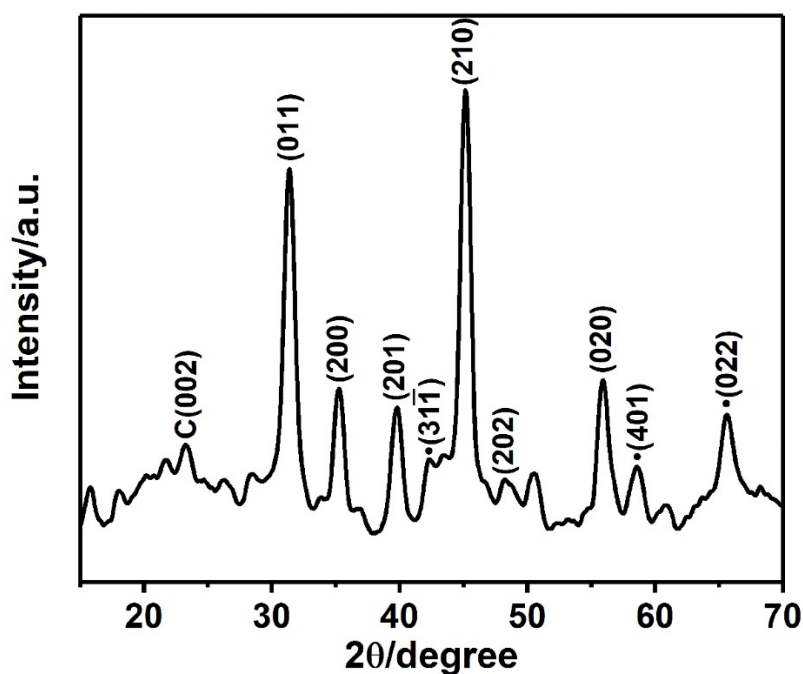

Fig. S9 XRD pattern of G@Co-W-P after the durability tests.



## References

- [S1] J. Jiang, C. Wang, J. Zhang, W. Wang, X. Zhou, B. Pan, K. Tang, J. Zuo, Q. Yang, *J. Mater. Chem. A* 2015, **3**, 499-503.
- [S2] L. Ji, J. Wang, X. Teng, T. J. Meyer, Z. Chen, *ACS Catal.* 2020, **10**, 412-419.
- [S3] Y. Hu, B. Yu, M. Ramadoss, W. Li, D. Yang, B. Wang, W. Chen, *ACS Sustain. Chem. Eng.* 2019, **7**, 10016-10024.
- [S4] T. Wang, X. Guo, J. Zhang, W. Xiao, P. Xi, S. Peng, D. Gao, *J. Mater. Chem. A* 2019, **7**, 4971-4976.
- [S5] Y. Huang, X. Song, J. Deng, C. Zha, W. Huang, Y. Wu, Y. Li, *Appl. Catal. B: Environ.* 2019, **245**, 656-661.
- [S6] Q. Liu, J. Tian, W. Cui, P. Jiang, N. Cheng, A. M. Asiri, X. Sun, *Angew. Chem. Int. Edit.* 2014, **53**, 6710-6714.
- [S7] L. Ji, J. Wang, X. Teng, H. Dong, X. He, Z. Chen, *ACS Appl. Mater. Interfaces* 2018, **10**, 14632-14640.
- [S8] Y. Pan, K. Sun, S. Liu, X. Cao, K. Wu, W. C. Cheong, Z. Chen, Y. Wang, Y. Li, Y. Liu, D. Wang, Q. Peng, C. Chen, Y. Li, *J. Am. Chem. Soc.* 2018, **140**, 2610-2618.
- [S9] Y. Lu, W. Hou, D. Yang, Y. Chen, *Electrochim. Acta* 2019, **307**, 543-552.
- [S10] Z. Y. Wu, B. C. Hu, P. Wu, H. W. Liang, Z. L. Yu, Y. Lin, Y. R. Zheng, Z. Li, S. H. Yu, *NPG Asia Mater.* 2016, **8**, e288.
- [S11] Y. Pan, W. Hu, D. Liu, Y. Liu, C. Liu, *J. Mater. Chem. A* 2015, **3**, 13087-13094.
- [S12] H. Du, S. Gu, R. Liu, C. M. Li, *J. Power Sources* 2015, **278**, 540-545.
- [S13] Z. Zhang, B. Lu, J. Hao, W. Yang, J. Tang, *Chem. Commun.* 2014, **50**, 11554-11557.
- [S14] M. Q. Wang, C. Ye, H. Liu, M. Xu, S. J. Bao, *Angew. Chem. Int. Edit.* 2018, **57**, 1963-1967.
- [S15] J. Yang, F. Zhang, X. Wang, D. He, G. Wu, Q. Yang, X. Hong, Y. Wu, Y. Li, *Angew. Chem. Int. Edit.* 2016, **55**, 12854-12858.
- [S16] X. Lv, J. Ren, Y. Wang, Y. Liu, Z. Y. Yuan, *ACS Sustain. Chem. Eng.* 2019, **7**, 8993-9001.
- [S17] Z. Pu, I. S. Amiin, C. Zhang, M. Wang, Z. Kou, S. Mu, *Nanoscale* 2017, **9**, 3555-3560.
- [S18] M. Li, X. Liu, Y. Xiong, X. Bo, Y. Zhang, C. Han, L. Guo, *J. Mater. Chem. A* 2015, **3**, 4255-4265.
- [S19] L. Lin, Z. Sun, M. Yuan, H. Yang, H. Li, C. Nan, H. Jiang, S. Ge, G. Sun, *ACS Sustain.*

- Chem. Eng.* 2019, **7**, 9637-9645.
- [S20] Z. Zhang, J. Hao, W. Yang, J. Tang, *ChemCatChem* 2015, **7**, 1920-1925.
- [S21] E. J. Popczun, J. R. McKone, C. G. Read, A. J. Biacchi, A. M. Wiltrout, N. S. Lewis, R. E. Schaak, *J. Am. Chem. Soc.* 2013, **135**, 9267-9270.
- [S22] L. Yang, H. Xu, H. Liu, D. Cheng, D. Cao, *Small Methods* 2019, **3**, 1900113.
- [S23] A. Muthurasu, V. Maruthapandian, H. Y. Kim, *Appl. Catal. B: Environ.* 2019, **248**, 202-210.
- [S24] J. Tian, Q. Liu, A. M. Asiri, X. Sun, *J. Am. Chem. Soc.* 2014, **136**, 7587-7590.
- [S25] M. Yi, B. Lu, X. Zhang, Y. Tan, Z. Zhu, Z. Pan, J. Zhang, *Appl. Catal. B: Environ.* 2021, **283**, 119635.
- [S26] L. Jiao, Y. X. Zhou, H. L. Jiang, *Chem. Sci.* 2016, **7**, 1690-1695.
- [S27] J. Song, C. Zhu, B. Z. Xu, S. Fu, M. H. Engelhard, R. Ye, D. Du, S. P. Beckman, Y. Lin, *Adv. Energy Mater.* 2017, **7**, 1601555.
- [S28] S. Surendran, S. Shanmugapriya, A. Sivanantham, S. Shanmugam, R. K. Selvan, *Adv. Energy Mater.* 2018, **8**, 1800555.
- [S29] Y. Zhao, J. Zhang, K. Li, Z. Ao, C. Wang, H. Liu, K. Sun, G. Wang, *J. Mater. Chem. A* 2016, **4**, 12818-12824.
- [S30] Z. Yin, C. Zhu, C. Li, S. Zhang, X. Zhang, Y. Chen, *Nanoscale* 2016, **8**, 19129-19138.
- [S31] P. W. Menezes, A. Indra, C. Das, C. Walter, C. Goebel, V. Gutkin, D. Schmeisser, M. Driess, *ACS Catal.* 2017, **7**, 103-109.
- [S32] Y. Liang, Q. Liu, A. M. Asiri, X. Sun, Y. Luo, *ACS Catal.* 2014, **4**, 4065-4069.
- [S33] L. Yan, L. Cao, P. Dai, X. Gu, D. Liu, L. Li, Y. Wang, X. Zhao, *Adv. Funct. Mater.* 2017, **27**, 1703455.
- [S34] P. Babar, A. Lokhande, H. H. Shin, B. Pawar, M. G. Gang, S. Pawar, J. M. Kim, *Small* 2018, **14**, 1702568.
- [S35] A. Han, H. Chen, H. Zhang, Z. Sun, P. Du, *J. Mater. Chem. A* 2016, **4**, 10195-10202.
- [S36] Y. Hou, M. Qiu, T. Zhang, X. Zhuang, C. S. Kim, C. Yuan, X. Feng, *Adv. Mater.* 2017, **29**, 1701589.
- [S37] J. Li, M. Yan, X. Zhou, Z. Q. Huang, Z. Xia, C. R. Chang, Y. Ma, Y. Qu, *Adv. Funct. Mater.* 2016, **26**, 6785-6796.
